# Supplementary material for: Evaluation of COVID-19 vaccination strategies with a delayed second dose
Source: PLoS Biol. 2021 Apr 21;19(4):e3001211. doi: 10.1371/journal.pbio.3001211 (PMC8092656; doi:10.1371/journal.pbio.3001211)
Supplement: S3 Data — (XLSX) [file pbio.3001211.s003.xlsx]

## Sheet: Sheet1
10% pre-existing immunity
Moderna	Fig 3A	Fig 3B	Fig 3C			Pfizer-BioNTech	Fig 3A	Fig 3B	Fig 3C
delay in weeks	Infections averted	Hospitalizations averted	Deaths averted			delay in weeks	Infections averted	Hospitalizations averted	Deaths averted
0	0	0	0			0	0	0	0
1	2.16199	0.186558	0.0996727			1	2.69495	-0.00905745	0.0430749
2	5.00687	0.256451	0.120033			2	2.11044	0.0230024	0.0520455
3	10.4708	0.321386	0.140015			3	1.10899	0.0506681	0.0692811
4	14.2525	0.454053	0.159441			4	-0.260543	0.108003	0.0895309
5	16.5701	0.571956	0.198111			5	-1.90525	0.152086	0.111383
6	17.6414	0.675546	0.235469			6	-4.75192	0.182645	0.133427
7	17.6846	0.765274	0.27081			7	-8.60516	0.199404	0.154251
8	16.9176	0.841591	0.303427			8	-13.2696	0.202091	0.172444
9	15.5583	0.90495	0.332615			9	-18.5499	0.190431	0.186593
10	13.8248	0.955801	0.357669			10	-24.2507	0.16415	0.195288
11	11.9351	0.994596	0.377883			11	-30.1765	0.122974	0.197118
12	10.1071	1.02179	0.392551			12	-36.1321	0.0666291	0.19067
13	8.55892	1.03782	0.400967			13	-41.9221	-0.0051588	0.174533
14	7.50842	1.04316	0.407788			14	-47.351	-0.0926637	0.147296
15	7.17365	1.03824	0.412643			15	-50.3323	-0.19616	0.107548
20% pre-existing immunity
Moderna	Fig 3A	Fig 3B	Fig 3C			Pfizer-BioNTech	Fig 3A	Fig 3B	Fig 3C
delay in weeks	Infections averted	Hospitalizations averted	Deaths averted			delay in weeks	Infections averted	Hospitalizations averted	Deaths averted
0	0	0	0			0	0	0	0
1	2.88607	0.159564	0.127871			1	8.40085	0.136128	0.0455046
2	3.96112	0.198102	0.147023			2	8.53005	0.178745	0.0608123
3	6.12868	0.235019	0.165306			3	8.27734	0.215208	0.0759106
4	7.83881	0.270151	0.182645			4	7.68882	0.292012	0.105675
5	9.12644	0.342789	0.218646			5	7.52147	0.350636	0.134622
6	10.0265	0.410399	0.251967			6	6.25449	0.392212	0.161993
7	10.5739	0.472329	0.282299			7	4.07227	0.417872	0.18703
8	10.8035	0.527927	0.309333			8	1.15922	0.428748	0.208976
9	10.7502	0.576541	0.332761			9	-2.30025	0.425974	0.227072
10	10.4491	0.617517	0.352272			10	-6.12176	0.410682	0.24056
11	9.93489	0.650203	0.367558			11	-10.1209	0.384004	0.248682
12	9.24262	0.673948	0.37831			12	-14.1132	0.347073	0.250681
13	8.40716	0.688098	0.384218			13	-17.9144	0.301021	0.245797
14	7.46344	0.698861	0.389019			14	-21.34	0.246981	0.233274
15	6.44636	0.706534	0.392256			15	-23.3163	0.186085	0.212353
30% pre-existing immunity
Moderna	Fig 3A	Fig 3B	Fig 3C			Pfizer-BioNTech	Fig 3A	Fig 3B	Fig 3C
delay in weeks	Infections averted	Hospitalizations averted	Deaths averted			delay in weeks	Infections averted	Hospitalizations averted	Deaths averted
0	0	0	0			0	0	0	0
1	7.30053	0.359893	0.16021			1	2.48806	0.129545	0.0932086
2	9.15133	0.432647	0.193332			2	1.87179	0.160657	0.110096
3	12.708	0.579361	0.223529			3	1.04587	0.222802	0.143943
4	15.1878	0.701408	0.285797			4	0.0385437	0.275232	0.172812
5	16.729	0.801201	0.339434			5	-1.40626	0.317787	0.196844
6	17.4699	0.881156	0.385022			6	-3.45176	0.350307	0.216183
7	17.5488	0.943685	0.42314			7	-5.98503	0.37263	0.230972
8	17.1041	0.991203	0.454369			8	-8.89314	0.384594	0.241352
9	16.274	1.02612	0.479288			9	-12.0632	0.38604	0.247468
10	15.1968	1.05086	0.498478			10	-15.3822	0.376806	0.249461
11	14.0109	1.06783	0.512519			11	-18.7373	0.356732	0.247475
12	12.8545	1.07944	0.521991			12	-22.0155	0.325655	0.241651
13	11.8659	1.08811	0.527475			13	-25.104	0.283416	0.232133
14	11.1835	1.09625	0.529551			14	-27.8898	0.229852	0.219064
15	10.9456	1.10628	0.528798			15	-29.4683	0.164804	0.202586
